# Supplementary material for: Sources of variability in nanoparticle uptake by cells
Source: Royal Society of Chemistry journal article supplement (doi:10.1039/d1nr04690j), 2021-01-01
Supplement: d1nr04690j3.csv [file d1nr04690j3.csv]

Name	Description	Unsorted (rpm)	Low (rpm)	High (rpm)	Low fold change	High fold change
SERTAD4	SERTA domain containing 4	0.0	0.0	3.779		inf
FLI1	Fli-1 proto-oncogene, ETS transcription factor	0.0	0.0	4.535		inf
CD33	CD33 molecule	0.0	0.0	3.779		inf
LINC01234	long intergenic non-protein coding RNA 1234	0.0	0.0	3.779		inf
POSTN	periostin	0.0	0.0	7.558		inf
CPEB1	cytoplasmic polyadenylation element binding protein 1	0.0	0.0	3.779		inf
RPL15P18	ribosomal protein L15 pseudogene 18	0.0	0.0	3.779		inf
PGK1P2	phosphoglycerate kinase 1, pseudogene 2	0.0	0.0	3.779		inf
AC125238.2	zinc finger protein 207 (ZNF207) pseudogene	0.0	0.0	3.779		inf
KCNMA1	potassium calcium-activated channel subfamily M alpha 1	0.0	0.0	4.535		inf
ROS1	ROS proto-oncogene 1, receptor tyrosine kinase	0.0	0.0	4.535		inf
MAGED1	MAGE family member D1	0.0	0.0	3.779		inf
AC006262.2	novel transcript	0.255	0.0	7.558	0.0	29.611
HHAT	hedgehog acyltransferase	0.255	0.0	6.803	0.0	26.65
CACNA1G	calcium voltage-gated channel subunit alpha1 G	0.766	0.434	14.361	0.567	18.754
CARD11	caspase recruitment domain family member 11	0.255	0.0	4.535	0.0	17.767
SH3RF3	SH3 domain containing ring finger 3	0.255	0.0	4.535	0.0	17.767
LRRC15	leucine rich repeat containing 15	0.766	0.434	12.093	0.567	15.793
POPDC3	popeye domain containing 3	0.511	0.0	7.558	0.0	14.806
SEMA5A	semaphorin 5A	0.255	0.0	3.779	0.0	14.806
BMP4	bone morphogenetic protein 4	0.511	0.0	6.803	0.0	13.325
TEK	TEK receptor tyrosine kinase	0.511	0.434	6.803	0.851	13.325
LYPD1	LY6/PLAUR domain containing 1	1.276	1.303	16.628	1.021	13.029
CNN1	calponin 1	0.511	0.0	6.047	0.0	11.844
CREB3L1	cAMP responsive element binding protein 3 like 1	1.276	0.0	13.605	0.0	10.66
ARL4C	ADP ribosylation factor like GTPase 4C	2.297	1.737	23.431	0.756	10.199
IFIT1	interferon induced protein with tetratricopeptide repeats 1	0.511	0.434	4.535	0.851	8.883
HOXA3	homeobox A3	0.766	0.0	6.803	0.0	8.883
TCN2	transcobalamin 2	0.511	0.0	4.535	0.0	8.883
ANK2	ankyrin 2	1.021	0.869	8.314	0.851	8.143
ITGA11	integrin subunit alpha 11	37.267	32.576	281.171	0.874	7.545
GPC4	glypican 4	1.532	0.0	11.338	0.0	7.403
TRPC4	transient receptor potential cation channel subfamily C member 4	1.021	0.0	7.558	0.0	7.403
PTGES	prostaglandin E synthase	5.105	2.172	37.036	0.425	7.255
CHRDL1	chordin like 1	0.766	0.434	5.291	0.567	6.909
FHOD3	formin homology 2 domain containing 3	1.532	0.869	10.582	0.567	6.909
ABCA1	ATP binding cassette subfamily A member 1	3.063	1.303	21.163	0.425	6.909
IL7R	interleukin 7 receptor	1.787	0.434	11.338	0.243	6.345
GPNMB	glycoprotein nmb	4.85	0.869	30.233	0.179	6.234
PKMP1	pyruvate kinase M1/2 pseudogene 1	0.766	0.434	4.535	0.567	5.922
TFAP2C	transcription factor AP-2 gamma	0.766	0.0	4.535	0.0	5.922
KRT17P3	keratin 17 pseudogene 3	1.021	0.434	6.047	0.425	5.922
CXCL3	C-X-C motif chemokine ligand 3	0.766	0.434	4.535	0.567	5.922
SUSD2	sushi domain containing 2	4.595	1.737	27.21	0.378	5.922
MMP2	matrix metallopeptidase 2	20.676	11.293	117.155	0.546	5.666
PAQR5	progestin and adipoQ receptor family member 5	2.042	0.434	10.582	0.213	5.182
COL6A2	collagen type VI alpha 2 chain	1.021	0.0	5.291	0.0	5.182
AC007683.1	ribosomal protein L19 (RPL19) pseudogene	1.787	1.303	9.07	0.729	5.076
NRG1	neuregulin 1	1.787	0.434	9.07	0.243	5.076
AR	androgen receptor	5.105	3.909	25.698	0.766	5.034
ARHGAP31	Rho GTPase activating protein 31	2.553	1.737	12.849	0.681	5.034
INSYN2B	inhibitory synaptic factor family member 2B	0.766	0.0	3.779	0.0	4.935
PROS1	protein S	4.595	3.909	22.675	0.851	4.935
CYB5R2	cytochrome b5 reductase 2	0.766	0.0	3.779	0.0	4.935
RPSAP58	ribosomal protein SA pseudogene 58	1.532	0.434	7.558	0.284	4.935
AC010894.2	novel transcript	0.766	0.0	3.779	0.0	4.935
AC009229.1	novel transcript	0.766	0.0	3.779	0.0	4.935
AC139749.1	uncharacterized LOC101927503	0.766	0.0	3.779	0.0	4.935
AMIGO2	adhesion molecule with Ig like domain 2	10.21	10.859	49.129	1.064	4.812
UQCRHL	ubiquinol-cytochrome c reductase hinge protein like	1.276	0.869	6.047	0.681	4.738
FN1	fibronectin 1	126.095	76.011	586.53	0.603	4.651
ABLIM3	actin binding LIM protein family member 3	4.084	1.303	18.896	0.319	4.627
EEF1A1P11	eukaryotic translation elongation factor 1 alpha 1 pseudogene 11	2.808	2.606	12.849	0.928	4.576
NRP2	neuropilin 2	3.318	3.04	15.117	0.916	4.556
CENPS	centromere protein S	1.021	0.0	4.535	0.0	4.442
CCDC7	coiled-coil domain containing 7	1.021	0.434	4.535	0.425	4.442
TP63	tumor protein p63	1.021	0.0	4.535	0.0	4.442
RAB3B	RAB3B, member RAS oncogene family	5.105	1.737	22.675	0.34	4.442
SCN5A	sodium voltage-gated channel alpha subunit 5	1.021	0.0	4.535	0.0	4.442
HMCN1	hemicentin 1	1.787	0.0	7.558	0.0	4.23
TPT1P4	tumor protein, translationally-controlled 1 pseudogene 4	1.276	0.869	5.291	0.681	4.146
YWHAZP3	tyrosine 3-monooxygenase/tryptophan 5-monooxygenase activation protein zeta pseudogene 3	1.276	0.869	5.291	0.681	4.146
TP53I11	tumor protein p53 inducible protein 11	2.297	0.434	9.07	0.189	3.948
AMN1	antagonist of mitotic exit network 1 homolog	3.063	2.172	12.093	0.709	3.948
KCNJ6	potassium voltage-gated channel subfamily J member 6	1.532	0.434	6.047	0.284	3.948
ICAM3	intercellular adhesion molecule 3	4.339	1.737	16.628	0.4	3.832
DMBT1	deleted in malignant brain tumors 1	2.808	2.172	10.582	0.773	3.769
LTBP2	latent transforming growth factor beta binding protein 2	8.423	4.778	31.745	0.567	3.769
CAPRIN2	caprin family member 2	2.808	2.172	10.582	0.773	3.769
ZNF775	zinc finger protein 775	2.042	1.303	7.558	0.638	3.701
RARRES2	retinoic acid receptor responder 2	2.042	2.172	7.558	1.064	3.701
UBASH3B	ubiquitin associated and SH3 domain containing B	2.042	0.869	7.558	0.425	3.701
MFAP5	microfibril associated protein 5	26.802	28.667	98.259	1.07	3.666
UQCRFS1P1	ubiquinol-cytochrome c reductase, Rieske iron-sulfur polypeptide 1 pseudogene 1	3.318	2.606	12.093	0.785	3.644
DUSP4	dual specificity phosphatase 4	21.952	8.687	79.363	0.396	3.615
EEF1A1P13	eukaryotic translation elongation factor 1 alpha 1 pseudogene 13	5.616	6.081	19.652	1.083	3.5
COL1A1	collagen type I alpha 1 chain	142.432	134.213	495.073	0.942	3.476
FRMD4A	FERM domain containing 4A	3.063	0.869	10.582	0.284	3.455
CBWD2	COBW domain containing 2	3.574	3.475	12.093	0.972	3.384
WNT5B	Wnt family member 5B	2.042	0.434	6.803	0.213	3.331
FTH1P20	ferritin heavy chain 1 pseudogene 20	2.297	1.303	7.558	0.567	3.29
AL161431.1	novel transcript	8.423	6.081	27.21	0.722	3.23
TGM2	transglutaminase 2	151.876	59.071	489.027	0.389	3.22
BDH2	3-hydroxybutyrate dehydrogenase 2	3.574	2.172	11.338	0.608	3.173
TENM2	teneurin transmembrane protein 2	14.549	5.647	46.106	0.388	3.169
DPYD	dihydropyrimidine dehydrogenase	11.486	12.162	36.28	1.059	3.159
CCND1	cyclin D1	55.39	49.516	173.843	0.894	3.139
ADAM19	ADAM metallopeptidase domain 19	4.595	3.475	14.361	0.756	3.126
MAML2	mastermind like transcriptional coactivator 2	9.7	9.99	29.478	1.03	3.039
RASSF5	Ras association domain family member 5	1.787	0.0	5.291	0.0	2.961
FAP	fibroblast activation protein alpha	1.787	0.434	5.291	0.243	2.961
SPRY1	sprouty RTK signaling antagonist 1	1.787	0.434	5.291	0.243	2.961
CPA4	carboxypeptidase A4	9.444	5.647	27.966	0.598	2.961
U91328.1	novel transcript	2.553	2.172	7.558	0.851	2.961
C2orf74	chromosome 2 open reading frame 74	1.276	0.0	3.779	0.0	2.961
MDK	midkine	3.574	3.475	10.582	0.972	2.961
SCN1B	sodium voltage-gated channel beta subunit 1	1.787	0.434	5.291	0.243	2.961
NACA2	nascent polypeptide associated complex subunit alpha 2	2.553	2.172	7.558	0.851	2.961
SCN9A	sodium voltage-gated channel alpha subunit 9	3.574	2.172	10.582	0.608	2.961
SPRY4	sprouty RTK signaling antagonist 4	2.297	0.434	6.803	0.189	2.961
IL17RD	interleukin 17 receptor D	1.276	0.0	3.779	0.0	2.961
FAM171A2	family with sequence similarity 171 member A2	2.553	2.172	7.558	0.851	2.961
FOSB	FosB proto-oncogene, AP-1 transcription factor subunit	37.012	29.101	104.306	0.786	2.818
GLIPR1	GLI pathogenesis related 1	19.91	21.717	55.932	1.091	2.809
FGD6	FYVE, RhoGEF and PH domain containing 6	4.85	3.475	13.605	0.716	2.805
PDGFC	platelet derived growth factor C	14.039	10.859	39.304	0.773	2.8
AC016717.2	novel transcript	4.084	1.737	11.338	0.425	2.776
TMSB10P1	thymosin beta 10 pseudogene 1	3.318	3.04	9.07	0.916	2.733
SPEG	SPEG complex locus	12.252	11.293	33.257	0.922	2.714
EIF5AL1	eukaryotic translation initiation factor 5A-like 1	2.808	2.172	7.558	0.773	2.692
PRDM1	PR/SET domain 1	2.808	1.303	7.558	0.464	2.692
MEF2C	myocyte enhancer factor 2C	10.465	11.293	27.966	1.079	2.672
AFAP1L2	actin filament associated protein 1 like 2	2.553	0.869	6.803	0.34	2.665
IGFBP5	insulin like growth factor binding protein 5	73.258	31.707	193.494	0.433	2.641
ACTG2	actin, gamma 2, smooth muscle, enteric	4.595	0.869	12.093	0.189	2.632
ZFYVE1	zinc finger FYVE-type containing 1	6.126	5.212	15.873	0.851	2.591
FMC1	formation of mitochondrial complex V assembly factor 1 homolog	2.042	0.869	5.291	0.425	2.591
EIF4BP7	eukaryotic translation initiation factor 4B pseudogene 7	1.787	0.434	4.535	0.243	2.538
ARHGAP42	Rho GTPase activating protein 42	6.892	6.95	17.384	1.008	2.522
ANGPT1	angiopoietin 1	3.318	2.172	8.314	0.654	2.506
PLXNA4	plexin A4	3.318	0.869	8.314	0.262	2.506
FZD9	frizzled class receptor 9	1.532	0.0	3.779	0.0	2.468
LINC01537	long intergenic non-protein coding RNA 1537	1.532	0.0	3.779	0.0	2.468
BGN	biglycan	27.312	16.505	67.27	0.604	2.463
TAGLN	transgelin	92.402	36.92	226.751	0.4	2.454
SOBP	sine oculis binding protein homolog	5.871	4.778	14.361	0.814	2.446
SLC12A8	solute carrier family 12 member 8	10.21	10.859	24.943	1.064	2.443
RPL13AP20	ribosomal protein L13a pseudogene 20	4.339	2.606	10.582	0.601	2.439
NFKBIZ	NFKB inhibitor zeta	5.616	3.909	13.605	0.696	2.423
BCAM	basal cell adhesion molecule (Lutheran blood group)	34.97	7.818	84.654	0.224	2.421
LPCAT2	lysophosphatidylcholine acyltransferase 2	6.637	6.515	15.873	0.982	2.392
RPL7AP30	ribosomal protein L7a pseudogene 30	3.829	2.606	9.07	0.681	2.369
BVES	blood vessel epicardial substance	4.85	4.343	11.338	0.896	2.338
EDN1	endothelin 1	3.574	2.172	8.314	0.608	2.327
GPR153	G protein-coupled receptor 153	5.871	5.212	13.605	0.888	2.317
LIF	LIF, interleukin 6 family cytokine	8.168	3.475	18.896	0.425	2.313
PDZD2	PDZ domain containing 2	10.21	1.737	23.431	0.17	2.295
F3	coagulation factor III, tissue factor	9.955	4.343	22.675	0.436	2.278
FCGRT	Fc fragment of IgG receptor and transporter	3.318	0.434	7.558	0.131	2.278
CSF2RA	colony stimulating factor 2 receptor alpha subunit	3.318	1.303	7.558	0.393	2.278
TEF	TEF, PAR bZIP transcription factor	7.658	6.515	17.384	0.851	2.27
DDR2	discoidin domain receptor tyrosine kinase 2	19.655	20.414	44.594	1.039	2.269
DKK3	dickkopf WNT signaling pathway inhibitor 3	10.721	11.293	24.187	1.053	2.256
TPD52L1	tumor protein D52 like 1	37.012	24.758	83.142	0.669	2.246
MYOCD	myocardin	30.63	16.505	68.781	0.539	2.246
CLDN1	claudin 1	35.736	35.616	80.119	0.997	2.242
RGL1	ral guanine nucleotide dissociation stimulator like 1	11.486	12.162	25.698	1.059	2.237
LYPD6B	LY6/PLAUR domain containing 6B	3.063	1.303	6.803	0.425	2.221
HTR1D	5-hydroxytryptamine receptor 1D	8.168	3.04	18.14	0.372	2.221
LGR6	leucine rich repeat containing G protein-coupled receptor 6	3.063	0.0	6.803	0.0	2.221
MAML3	mastermind like transcriptional coactivator 3	14.039	9.99	30.989	0.712	2.207
AOX1	aldehyde oxidase 1	9.955	9.121	21.919	0.916	2.202
SETBP1	SET binding protein 1	12.763	5.212	27.966	0.408	2.191
ACTA2	actin, alpha 2, smooth muscle, aorta	102.357	21.717	223.728	0.212	2.186
SLC22A23	solute carrier family 22 member 23	8.679	6.081	18.896	0.701	2.177
CCDC9B	coiled-coil domain containing 9B	10.465	9.99	22.675	0.955	2.167
CDK7	cyclin dependent kinase 7	19.91	20.414	43.083	1.025	2.164
MYLK	myosin light chain kinase	9.444	3.04	20.408	0.322	2.161
DLL3	delta like canonical Notch ligand 3	2.808	1.303	6.047	0.464	2.154
ABCB1	ATP binding cassette subfamily B member 1	2.808	1.303	6.047	0.464	2.154
RNF144A	ring finger protein 144A	2.808	0.434	6.047	0.155	2.154
KRT17	keratin 17	870.161	933.412	1862.383	1.073	2.14
PRICKLE1	prickle planar cell polarity protein 1	4.595	1.303	9.826	0.284	2.139
GLIPR2	GLI pathogenesis related 2	10.976	8.687	23.431	0.791	2.135
NID1	nidogen 1	64.324	65.152	136.807	1.013	2.127
PLK2	polo like kinase 2	51.051	36.485	108.085	0.715	2.117
LINC00941	long intergenic non-protein coding RNA 941	7.147	5.647	15.117	0.79	2.115
PROM1	prominin 1	3.574	1.303	7.558	0.365	2.115
BOK	BOK, BCL2 family apoptosis regulator	16.592	8.253	34.769	0.497	2.096
MVP	major vault protein	18.889	16.94	39.304	0.897	2.081
CDH6	cadherin 6	10.21	7.818	21.163	0.766	2.073
NRP1	neuropilin 1	28.844	18.243	59.711	0.632	2.07
MAST1	microtubule associated serine/threonine kinase 1	5.871	4.778	12.093	0.814	2.06
SLC16A9	solute carrier family 16 member 9	3.318	1.303	6.803	0.393	2.05
SYPL2	synaptophysin like 2	3.318	1.737	6.803	0.524	2.05
CLUHP3	clustered mitochondria homolog pseudogene 3	3.318	1.737	6.803	0.524	2.05
BOC	BOC cell adhesion associated, oncogene regulated	3.318	0.0	6.803	0.0	2.05
NXN	nucleoredoxin	43.648	30.839	89.189	0.707	2.043
GREM1	gremlin 1, DAN family BMP antagonist	21.186	14.768	43.083	0.697	2.034
EMP1	epithelial membrane protein 1	21.697	21.283	43.839	0.981	2.021
DAPK1	death associated protein kinase 1	7.147	2.606	14.361	0.365	2.009
HMG20B	high mobility group 20B	140.645	192.416	70.293	1.368	0.5
SNRK	SNF related kinase	46.967	45.606	23.431	0.971	0.499
MLLT11	MLLT11, transcription factor 7 cofactor	24.249	43.435	12.093	1.791	0.499
RAB11B-AS1	RAB11B antisense RNA 1	1.532	2.606	0.756	1.702	0.494
ZNF624	zinc finger protein 624	3.063	3.909	1.512	1.276	0.494
SSR4P1	signal sequence receptor subunit 4 pseudogene 1	4.595	6.081	2.268	1.323	0.494
TP53INP1	tumor protein p53 inducible nuclear protein 1	4.595	6.081	2.268	1.323	0.494
MYPN	myopalladin	6.126	8.687	3.023	1.418	0.494
TRADD	TNFRSF1A associated via death domain	6.126	5.647	3.023	0.922	0.494
ZNF354B	zinc finger protein 354B	6.126	6.515	3.023	1.064	0.494
LRRC8E	leucine rich repeat containing 8 VRAC subunit E	3.063	6.515	1.512	2.127	0.494
CISH	cytokine inducible SH2 containing protein	4.595	4.343	2.268	0.945	0.494
SMIM3	small integral membrane protein 3	4.595	6.515	2.268	1.418	0.494
CBWD1	COBW domain containing 1	3.063	3.909	1.512	1.276	0.494
ZSCAN20	zinc finger and SCAN domain containing 20	6.126	6.95	3.023	1.134	0.494
ZNF879	zinc finger protein 879	1.532	2.606	0.756	1.702	0.494
AC090229.1	novel transcript	3.063	3.475	1.512	1.134	0.494
ZNF213-AS1	ZNF213 antisense RNA 1 (head to head)	3.063	3.909	1.512	1.276	0.494
ZBTB37	zinc finger and BTB domain containing 37	10.721	13.465	5.291	1.256	0.494
FAM111A-DT	FAM111A divergent transcript	1.532	2.606	0.756	1.702	0.494
PAQR8	progestin and adipoQ receptor family member 8	9.189	10.424	4.535	1.134	0.494
TIRAP	TIR domain containing adaptor protein	4.595	4.778	2.268	1.04	0.494
CTC-338M12.4	uncharacterized LOC101928649	4.595	4.778	2.268	1.04	0.494
GIN1	gypsy retrotransposon integrase 1	6.126	9.99	3.023	1.631	0.494
HIST1H2BC	histone cluster 1 H2B family member c	1.532	2.606	0.756	1.702	0.494
CD27-AS1	CD27 antisense RNA 1	3.063	3.04	1.512	0.993	0.494
LPXN	leupaxin	1.532	3.04	0.756	1.985	0.494
ZNF385B	zinc finger protein 385B	3.063	3.909	1.512	1.276	0.494
AKAP7	A-kinase anchoring protein 7	3.063	4.343	1.512	1.418	0.494
EFNA1	ephrin A1	79.894	78.182	39.304	0.979	0.492
ESRP2	epithelial splicing regulatory protein 2	33.949	32.142	16.628	0.947	0.49
FZD4	frizzled class receptor 4	29.354	27.364	14.361	0.932	0.489
CRELD1	cysteine rich with EGF like domains 1	54.114	112.496	26.454	2.079	0.489
SIL1	SIL1 nucleotide exchange factor	51.306	62.112	24.943	1.211	0.486
CLGN	calmegin	48.754	72.102	23.431	1.479	0.481
C10orf88	chromosome 10 open reading frame 88	9.444	8.687	4.535	0.92	0.48
ZNF267	zinc finger protein 267	9.444	9.99	4.535	1.058	0.48
EEF1A2	eukaryotic translation elongation factor 1 alpha 2	89.849	218.042	43.083	2.427	0.479
PDIA4	protein disulfide isomerase family A member 4	535.268	1111.494	256.229	2.077	0.479
ING3	inhibitor of growth family member 3	15.826	14.768	7.558	0.933	0.478
KIF26A	kinesin family member 26A	352.506	322.72	167.796	0.916	0.476
MARK1	microtubule affinity regulating kinase 1	27.057	28.233	12.849	1.043	0.475
MFSD12	major facilitator superfamily domain containing 12	238.918	361.377	113.376	1.513	0.475
LINGO2	leucine rich repeat and Ig domain containing 2	6.381	6.515	3.023	1.021	0.474
C17orf51	chromosome 17 open reading frame 51	56.156	55.596	26.454	0.99	0.471
SLC29A2	solute carrier family 29 member 2	32.162	29.536	15.117	0.918	0.47
ENKD1	enkurin domain containing 1	25.781	23.889	12.093	0.927	0.469
MRPL38	mitochondrial ribosomal protein L38	4.85	5.647	2.268	1.164	0.468
TXNRD3	thioredoxin reductase 3	4.85	5.647	2.268	1.164	0.468
CPLANE2	ciliogenesis and planar polarity effector 2	4.85	5.647	2.268	1.164	0.468
ABCB9	ATP binding cassette subfamily B member 9	4.85	5.647	2.268	1.164	0.468
GIPC3	GIPC PDZ domain containing family member 3	113.078	144.638	52.909	1.279	0.468
USH1C	USH1 protein network component harmonin	79.384	133.345	37.036	1.68	0.467
NFATC2	nuclear factor of activated T cells 2	48.754	48.213	22.675	0.989	0.465
C1orf56	chromosome 1 open reading frame 56	13.018	18.243	6.047	1.401	0.464
AL359915.2	uncharacterized LOC101929147	8.168	7.384	3.779	0.904	0.463
SEMA6D	semaphorin 6D	16.336	17.808	7.558	1.09	0.463
GAA	glucosidase alpha, acid	87.042	101.203	40.059	1.163	0.46
KLF4	Kruppel like factor 4	136.816	126.395	62.734	0.924	0.459
DNMBP	dynamin binding protein	270.314	262.346	123.201	0.971	0.456
SLC30A4	solute carrier family 30 member 4	3.318	9.99	1.512	3.011	0.456
ZBED8	zinc finger BED-type containing 8	6.637	9.556	3.023	1.44	0.456
TMEM63C	transmembrane protein 63C	3.318	6.515	1.512	1.963	0.456
ERVMER34-1	endogenous retrovirus group MER34 member 1, envelope	3.318	3.909	1.512	1.178	0.456
CDK20	cyclin dependent kinase 20	3.318	3.909	1.512	1.178	0.456
ADCK5	aarF domain containing kinase 5	3.318	3.475	1.512	1.047	0.456
COG6	component of oligomeric golgi complex 6	23.228	21.717	10.582	0.935	0.456
TNFSF13	TNF superfamily member 13	3.318	3.909	1.512	1.178	0.456
SCO2	SCO2, cytochrome c oxidase assembly protein	3.318	3.475	1.512	1.047	0.456
AC138150.2	uncharacterized LOC105371795	3.318	3.909	1.512	1.178	0.456
CDYL2	chromodomain Y like 2	43.393	62.112	19.652	1.431	0.453
ZIC2	Zic family member 2	51.817	49.95	23.431	0.964	0.452
NEXN	nexilin F-actin binding protein	37.267	34.313	16.628	0.921	0.446
HOXC4	homeobox C4	5.105	8.687	2.268	1.702	0.444
C11orf86	chromosome 11 open reading frame 86	5.105	5.212	2.268	1.021	0.444
LRRC37B	leucine rich repeat containing 37B	5.105	4.778	2.268	0.936	0.444
FAM86JP	family with sequence similarity 86 member J, pseudogene	5.105	5.647	2.268	1.106	0.444
LCA5	LCA5, lebercilin	5.105	4.778	2.268	0.936	0.444
STARD8	StAR related lipid transfer domain containing 8	5.105	6.515	2.268	1.276	0.444
ZNF611	zinc finger protein 611	6.892	6.515	3.023	0.945	0.439
ADGRG1	adhesion G protein-coupled receptor G1	233.047	371.367	102.038	1.594	0.438
JPH1	junctophilin 1	76.066	71.233	33.257	0.936	0.437
SPRYD7	SPRY domain containing 7	8.679	8.253	3.779	0.951	0.435
PHLPP2	PH domain and leucine rich repeat protein phosphatase 2	8.679	8.687	3.779	1.001	0.435
GNAO1	G protein subunit alpha o1	19.144	21.283	8.314	1.112	0.434
SYT12	synaptotagmin 12	143.197	140.728	61.979	0.983	0.433
RNF182	ring finger protein 182	378.542	382.66	163.261	1.011	0.431
PRKAR2B	protein kinase cAMP-dependent type II regulatory subunit beta	17.613	18.677	7.558	1.06	0.429
MBNL3	muscleblind like splicing regulator 3	213.648	202.84	90.7	0.949	0.425
CRELD2	cysteine rich with EGF like domains 2	196.035	440.862	83.142	2.249	0.424
ADAMTS10	ADAM metallopeptidase with thrombospondin type 1 motif 10	7.147	6.515	3.023	0.912	0.423
LINC01315	long intergenic non-protein coding RNA 1315	1.787	2.606	0.756	1.459	0.423
ENPP1	ectonucleotide pyrophosphatase/phosphodiesterase 1	12.507	12.596	5.291	1.007	0.423
RASD1	ras related dexamethasone induced 1	5.36	5.212	2.268	0.972	0.423
HEMK1	HemK methyltransferase family member 1	12.507	13.465	5.291	1.077	0.423
DOK7	docking protein 7	17.868	21.283	7.558	1.191	0.423
FAM50B	family with sequence similarity 50 member B	23.228	22.586	9.826	0.972	0.423
LINC01547	long intergenic non-protein coding RNA 1547	1.787	2.606	0.756	1.459	0.423
EFHD1	EF-hand domain family member D1	1.787	3.475	0.756	1.945	0.423
PLEKHH1	pleckstrin homology, MyTH4 and FERM domain containing H1	7.147	8.253	3.023	1.155	0.423
AC141586.1	potassium channel tetramerization domain containing 5 pseudogene	3.574	6.081	1.512	1.702	0.423
SMIM27	small integral membrane protein 27	3.574	4.343	1.512	1.215	0.423
SRP14-AS1	SRP14 antisense RNA1 (head to head)	1.787	5.212	0.756	2.917	0.423
BISPR	BST2 interferon stimulated positive regulator	5.36	5.647	2.268	1.053	0.423
UBE3D	ubiquitin protein ligase E3D	5.36	6.515	2.268	1.215	0.423
IQCH	IQ motif containing H	1.787	3.04	0.756	1.702	0.423
ATP8A1	ATPase phospholipid transporting 8A1	7.147	9.556	3.023	1.337	0.423
PAGR1	PAXIP1 associated glutamate rich protein 1	8.934	10.859	3.779	1.215	0.423
C2orf76	chromosome 2 open reading frame 76	5.36	6.081	2.268	1.134	0.423
SDHAP3	succinate dehydrogenase complex flavoprotein subunit A pseudogene 3	1.787	3.04	0.756	1.702	0.423
PPP4R1L	protein phosphatase 4 regulatory subunit 1 like (pseudogene)	1.787	2.606	0.756	1.459	0.423
NFIL3	nuclear factor, interleukin 3 regulated	39.309	37.354	16.628	0.95	0.423
SARS2	seryl-tRNA synthetase 2, mitochondrial	5.36	6.515	2.268	1.215	0.423
SPCS2	signal peptidase complex subunit 2	37.778	40.394	15.873	1.069	0.42
HYOU1	hypoxia up-regulated 1	678.465	1448.982	284.951	2.136	0.42
ARHGEF9	Cdc42 guanine nucleotide exchange factor 9	19.91	21.717	8.314	1.091	0.418
KATNAL1	katanin catalytic subunit A1 like 1	14.549	15.202	6.047	1.045	0.416
TMEM254	transmembrane protein 254	12.763	11.727	5.291	0.919	0.415
C1orf21	chromosome 1 open reading frame 21	96.741	89.476	40.059	0.925	0.414
HLA-L	major histocompatibility complex, class I, L (pseudogene)	10.976	14.768	4.535	1.345	0.413
FAM13C	family with sequence similarity 13 member C	7.402	17.374	3.023	2.347	0.408
KLHL36	kelch like family member 36	20.42	19.111	8.314	0.936	0.407
SLC2A13	solute carrier family 2 member 13	184.293	208.487	74.072	1.131	0.402
GAREM1	GRB2 associated regulator of MAPK1 subtype 1	28.333	33.879	11.338	1.196	0.4
SPINT2	serine peptidase inhibitor, Kunitz type 2	3.829	3.909	1.512	1.021	0.395
HSP90B3P	heat shock protein 90 beta family member 3, pseudogene	3.829	4.343	1.512	1.134	0.395
LYPD3	LY6/PLAUR domain containing 3	3.829	4.343	1.512	1.134	0.395
TEX9	testis expressed 9	5.871	5.647	2.268	0.962	0.386
AC016205.1	novel transcript	5.871	6.95	2.268	1.184	0.386
IFT74	intraflagellar transport 74	5.871	5.647	2.268	0.962	0.386
PPP2R3A	protein phosphatase 2 regulatory subunit B''alpha	5.871	6.515	2.268	1.11	0.386
FANCB	FA complementation group B	5.871	6.081	2.268	1.036	0.386
PCBD2	pterin-4 alpha-carbinolamine dehydratase 2	7.913	7.818	3.023	0.988	0.382
LZTR1	leucine zipper like transcription regulator 1	9.955	9.556	3.779	0.96	0.38
KRBA1	KRAB-A domain containing 1	11.997	12.162	4.535	1.014	0.378
LINC00265	long intergenic non-protein coding RNA 265	2.042	3.04	0.756	1.489	0.37
LRRC26	leucine rich repeat containing 26	4.084	4.343	1.512	1.064	0.37
KLRG2	killer cell lectin like receptor G2	2.042	2.606	0.756	1.276	0.37
ALOX12-AS1	ALOX12 antisense RNA 1	2.042	2.606	0.756	1.276	0.37
TMEM161B-AS1	TMEM161B antisense RNA 1	4.084	5.212	1.512	1.276	0.37
CDKN2D	cyclin dependent kinase inhibitor 2D	4.084	3.909	1.512	0.957	0.37
SEPT7P2	septin 7 pseudogene 2	6.126	6.95	2.268	1.134	0.37
CLIC3	chloride intracellular channel 3	2.042	6.081	0.756	2.978	0.37
STAG3L2	stromal antigen 3-like 2 (pseudogene)	2.042	3.04	0.756	1.489	0.37
NT5M	5',3'-nucleotidase, mitochondrial	2.042	3.475	0.756	1.702	0.37
PRKG2	protein kinase cGMP-dependent 2	4.084	4.778	1.512	1.17	0.37
BARX1	BARX homeobox 1	2.042	2.606	0.756	1.276	0.37
ZFP3	ZFP3 zinc finger protein	2.042	2.606	0.756	1.276	0.37
USP2	ubiquitin specific peptidase 2	18.634	17.808	6.803	0.956	0.365
PQLC2	PQ loop repeat containing 2	14.549	15.636	5.291	1.075	0.364
SAMD5	sterile alpha motif domain containing 5	27.312	30.404	9.826	1.113	0.36
DSC2	desmocollin 2	18.889	17.808	6.803	0.943	0.36
ERMAP	erythroblast membrane associated protein (Scianna blood group)	10.721	10.424	3.779	0.972	0.353
AQP3	aquaporin 3 (Gill blood group)	265.719	262.78	93.724	0.989	0.353
ZXDB	zinc finger X-linked duplicated B	17.357	18.243	6.047	1.051	0.348
RORC	RAR related orphan receptor C	4.339	6.95	1.512	1.602	0.348
C18orf32	chromosome 18 open reading frame 32	4.339	4.778	1.512	1.101	0.348
SPACA9	sperm acrosome associated 9	4.339	4.778	1.512	1.101	0.348
ZNF322	zinc finger protein 322	6.637	6.515	2.268	0.982	0.342
RASGEF1B	RasGEF domain family member 1B	6.637	6.515	2.268	0.982	0.342
PCSK9	proprotein convertase subtilisin/kexin type 9	607.76	585.5	207.099	0.963	0.341
ROBO2	roundabout guidance receptor 2	17.868	23.455	6.047	1.313	0.338
LAMA1	laminin subunit alpha 1	525.823	477.782	177.622	0.909	0.338
SLC8B1	solute carrier family 8 member B1	13.528	23.455	4.535	1.734	0.335
RHOV	ras homolog family member V	13.528	12.596	4.535	0.931	0.335
CREB5	cAMP responsive element binding protein 5	20.42	20.414	6.803	1.0	0.333
RELL2	RELT like 2	6.892	7.818	2.268	1.134	0.329
HSD17B8	hydroxysteroid 17-beta dehydrogenase 8	9.189	10.424	3.023	1.134	0.329
ZNF18	zinc finger protein 18	2.297	2.606	0.756	1.134	0.329
ACADS	acyl-CoA dehydrogenase short chain	4.595	4.778	1.512	1.04	0.329
PARD6B	par-6 family cell polarity regulator beta	2.297	5.647	0.756	2.458	0.329
NAPA-AS1	NAPA antisense RNA 1	2.297	2.606	0.756	1.134	0.329
AC011498.7	TEC	2.297	2.606	0.756	1.134	0.329
HIST1H4E	histone cluster 1 H4 family member e	2.297	2.606	0.756	1.134	0.329
EPHA6	EPH receptor A6	2.297	2.606	0.756	1.134	0.329
PDE1A	phosphodiesterase 1A	88.318	131.607	28.722	1.49	0.325
TOGARAM2	TOG array regulator of axonemal microtubules 2	30.375	36.485	9.826	1.201	0.323
CD83	CD83 molecule	151.11	155.062	48.374	1.026	0.32
PARM1	prostate androgen-regulated mucin-like protein 1	4.85	8.253	1.512	1.702	0.312
AC020978.5	novel transcript, antisense to NFATC3	4.85	4.778	1.512	0.985	0.312
TMC7	transmembrane channel like 7	4.85	5.212	1.512	1.075	0.312
RETREG1	reticulophagy regulator 1	102.357	142.032	30.989	1.388	0.303
EML1	echinoderm microtubule associated protein like 1	2.553	8.253	0.756	3.233	0.296
FAM122C	family with sequence similarity 122C	5.105	6.081	1.512	1.191	0.296
FLVCR2	feline leukemia virus subgroup C cellular receptor family member 2	5.105	5.212	1.512	1.021	0.296
EML6	echinoderm microtubule associated protein like 6	2.553	2.606	0.756	1.021	0.296
MTRF1	mitochondrial translation release factor 1	5.105	7.384	1.512	1.446	0.296
BTC	betacellulin	2.553	2.606	0.756	1.021	0.296
SGK3	serum/glucocorticoid regulated kinase family member 3	5.105	9.556	1.512	1.872	0.296
AL590705.1	novel transcript	2.553	3.04	0.756	1.191	0.296
CCL28	C-C motif chemokine ligand 28	2.553	4.343	0.756	1.702	0.296
DUSP8	dual specificity phosphatase 8	10.21	22.586	3.023	2.212	0.296
ADAP2	ArfGAP with dual PH domains 2	2.553	12.162	0.756	4.765	0.296
SP6	Sp6 transcription factor	2.553	2.606	0.756	1.021	0.296
FAM184A	family with sequence similarity 184 member A	10.21	10.859	3.023	1.064	0.296
C19orf66	chromosome 19 open reading frame 66	10.21	10.424	3.023	1.021	0.296
ZNF333	zinc finger protein 333	10.465	10.859	3.023	1.038	0.289
HBEGF	heparin binding EGF like growth factor	5.36	9.121	1.512	1.702	0.282
DNER	delta/notch like EGF repeat containing	227.687	317.073	64.246	1.393	0.282
HDHD2	haloacid dehalogenase like hydrolase domain containing 2	5.36	6.95	1.512	1.296	0.282
CDH11	cadherin 11	77.597	77.748	21.919	1.002	0.282
NOG	noggin	16.336	15.202	4.535	0.931	0.278
KCNIP3	potassium voltage-gated channel interacting protein 3	19.399	20.849	5.291	1.075	0.273
ZNF417	zinc finger protein 417	2.808	3.04	0.756	1.083	0.269
CRIP1	cysteine rich protein 1	2.808	3.909	0.756	1.392	0.269
ARHGAP27	Rho GTPase activating protein 27	2.808	4.343	0.756	1.547	0.269
PARD6G-AS1	PARD6G antisense RNA 1	2.808	3.475	0.756	1.238	0.269
NMRK1	nicotinamide riboside kinase 1	5.616	6.081	1.512	1.083	0.269
AC244033.2	novel transcript	2.808	2.606	0.756	0.928	0.269
TNFRSF11B	TNF receptor superfamily member 11b	43.648	46.041	11.338	1.055	0.26
SLC16A14	solute carrier family 16 member 14	17.613	24.323	4.535	1.381	0.257
CD70	CD70 molecule	3.063	3.04	0.756	0.993	0.247
AC010969.2	novel transcript	3.063	3.475	0.756	1.134	0.247
CHST7	carbohydrate sulfotransferase 7	3.063	3.475	0.756	1.134	0.247
PDE1C	phosphodiesterase 1C	6.381	9.556	1.512	1.497	0.237
TM7SF2	transmembrane 7 superfamily member 2	6.381	6.081	1.512	0.953	0.237
CGRRF1	cell growth regulator with ring finger domain 1	6.381	7.818	1.512	1.225	0.237
SERTM1	serine rich and transmembrane domain containing 1	57.687	53.859	13.605	0.934	0.236
CCDC3	coiled-coil domain containing 3	28.333	37.788	6.047	1.334	0.213
KIAA0513	KIAA0513	3.574	4.343	0.756	1.215	0.212
CHST13	carbohydrate sulfotransferase 13	7.147	9.121	1.512	1.276	0.212
ZNF616	zinc finger protein 616	10.721	12.162	2.268	1.134	0.212
AC023043.1	uncharacterized LOC101927809	15.315	16.505	3.023	1.078	0.197
GRB14	growth factor receptor bound protein 14	3.829	4.343	0.756	1.134	0.197
ISL2	ISL LIM homeobox 2	3.829	3.475	0.756	0.908	0.197
MEIS3P1	Meis homeobox 3 pseudogene 1	4.595	5.212	0.756	1.134	0.165
AGBL1	ATP/GTP binding protein like 1	4.595	5.212	0.756	1.134	0.165
TTC32	tetratricopeptide repeat domain 32	5.105	5.212	0.756	1.021	0.148
EPM2A	EPM2A, laforin glucan phosphatase	5.871	5.647	0.756	0.962	0.129
LRRN2	leucine rich repeat neuronal 2	6.126	7.818	0.756	1.276	0.123
BEX2	brain expressed X-linked 2	7.658	9.556	0.756	1.248	0.099
AL390778.2	novel transcript	8.679	9.99	0.756	1.151	0.087
AL583722.1	novel transcript	1.276	2.172	0.0	1.702	0.0
RN7SL689P	RNA, 7SL, cytoplasmic 689, pseudogene	0.766	3.475	0.0	4.538	0.0
DDN-AS1	DDN and PRKAG1 antisense RNA 1	1.532	2.606	0.0	1.702	0.0
AC005520.2	uncharacterized LOC100506476	1.021	3.909	0.0	3.829	0.0
RHPN1-AS1	RHPN1 antisense RNA 1 (head to head)	0.766	2.606	0.0	3.403	0.0
SI	sucrase-isomaltase	2.042	3.04	0.0	1.489	0.0
AP003469.4	novel transcript	0.255	2.172	0.0	8.508	0.0
HOXA10-AS	HOXA10 antisense RNA	2.042	2.606	0.0	1.276	0.0
GMDS-DT	GMDS divergent transcript	1.276	2.606	0.0	2.042	0.0
TIGAR	TP53 induced glycolysis regulatory phosphatase	1.276	2.606	0.0	2.042	0.0
RGS11	regulator of G protein signaling 11	0.255	2.172	0.0	8.508	0.0
AC022211.2	uncharacterized LOC100287042	2.042	2.606	0.0	1.276	0.0
RPL10P16	ribosomal protein L10 pseudogene 16	1.276	2.172	0.0	1.702	0.0
PHYHIP	phytanoyl-CoA 2-hydroxylase interacting protein	2.297	4.343	0.0	1.891	0.0
C16orf71	chromosome 16 open reading frame 71	1.021	2.172	0.0	2.127	0.0
KCNG3	potassium voltage-gated channel modifier subfamily G member 3	1.021	3.04	0.0	2.978	0.0
F8A1	coagulation factor VIII associated 1	2.042	4.343	0.0	2.127	0.0
ICA1L	islet cell autoantigen 1 like	1.532	4.778	0.0	3.12	0.0
LRRC56	leucine rich repeat containing 56	2.042	2.172	0.0	1.064	0.0
CD74	CD74 molecule	4.084	4.343	0.0	1.064	0.0
ZNF658	zinc finger protein 658	1.787	2.172	0.0	1.215	0.0
TPPP3	tubulin polymerization promoting protein family member 3	2.808	3.04	0.0	1.083	0.0
GLIS1	GLIS family zinc finger 1	1.532	3.909	0.0	2.552	0.0
AC026801.2	uncharacterized LOC101929704	2.808	3.475	0.0	1.238	0.0
CNIH2	cornichon family AMPA receptor auxiliary protein 2	1.276	2.172	0.0	1.702	0.0
DIRAS1	DIRAS family GTPase 1	2.553	3.909	0.0	1.531	0.0
ANKFN1	ankyrin repeat and fibronectin type III domain containing 1	3.063	3.909	0.0	1.276	0.0
CCDC149	coiled-coil domain containing 149	0.766	2.606	0.0	3.403	0.0
AC105250.1	heat shock 70kDa protein 5 (glucose-regulated protein, 78kDa) (HSPA5) pseudogene	0.766	2.606	0.0	3.403	0.0
EPHX2	epoxide hydrolase 2	1.532	2.606	0.0	1.702	0.0
AC139887.2	uncharacterized LOC100129917	1.276	3.04	0.0	2.382	0.0
SH3BP1	SH3 domain binding protein 1	0.766	2.172	0.0	2.836	0.0
CDK5RAP3	CDK5 regulatory subunit associated protein 3	1.276	3.04	0.0	2.382	0.0
AC007238.1	IK cytokine, down-regulator of HLA II (IK) pseudogene	1.021	2.172	0.0	2.127	0.0
ACTG1P14	actin gamma 1 pseudogene 14	2.042	2.172	0.0	1.064	0.0
ZNF699	zinc finger protein 699	2.297	3.909	0.0	1.702	0.0
PIWIL4	piwi like RNA-mediated gene silencing 4	1.276	2.606	0.0	2.042	0.0
KHSRPP1	KH-type splicing regulatory protein pseudogene 1	0.511	2.172	0.0	4.254	0.0
LRP2BP	LRP2 binding protein	0.255	2.172	0.0	8.508	0.0
MRO	maestro	1.021	2.606	0.0	2.552	0.0
ZNF441	zinc finger protein 441	0.766	3.04	0.0	3.97	0.0
TBC1D8B	TBC1 domain family member 8B	2.042	3.909	0.0	1.914	0.0
SNORA73B	small nucleolar RNA, H/ACA box 73B	1.276	2.172	0.0	1.702	0.0
PSMB8-AS1	PSMB8 antisense RNA 1 (head to head)	1.276	2.172	0.0	1.702	0.0
APOM	apolipoprotein M	1.021	2.172	0.0	2.127	0.0
ZNF684	zinc finger protein 684	2.553	3.04	0.0	1.191	0.0
KCNQ4	potassium voltage-gated channel subfamily Q member 4	1.276	2.172	0.0	1.702	0.0
SMN2	survival of motor neuron 2, centromeric	2.042	2.172	0.0	1.064	0.0
HSP90AB2P	heat shock protein 90 alpha family class B member 2, pseudogene	1.276	3.04	0.0	2.382	0.0
GATA3	GATA binding protein 3	2.553	2.606	0.0	1.021	0.0
PRPH	peripherin	0.511	2.172	0.0	4.254	0.0
GAS6-AS1	GAS6 antisense RNA 1	3.318	3.475	0.0	1.047	0.0
SAMD15	sterile alpha motif domain containing 15	1.787	2.606	0.0	1.459	0.0
UGDH-AS1	UGDH antisense RNA 1	2.297	2.172	0.0	0.945	0.0
SATB1	SATB homeobox 1	1.787	3.04	0.0	1.702	0.0
PIGZ	phosphatidylinositol glycan anchor biosynthesis class Z	1.021	2.172	0.0	2.127	0.0
PRR36	proline rich 36	0.766	2.606	0.0	3.403	0.0
USP51	ubiquitin specific peptidase 51	1.276	2.172	0.0	1.702	0.0
CNTF	ciliary neurotrophic factor	1.021	2.172	0.0	2.127	0.0
RBBP4P2	RB binding protein 4 pseudogene 2	0.255	2.172	0.0	8.508	0.0
RPS4XP13	ribosomal protein S4X pseudogene 13	0.511	3.04	0.0	5.956	0.0
SRRM4	serine/arginine repetitive matrix 4	0.766	2.606	0.0	3.403	0.0
RNF125	ring finger protein 125	0.766	3.475	0.0	4.538	0.0
KDM4A-AS1	KDM4A antisense RNA 1	1.276	2.606	0.0	2.042	0.0
AGTR1	angiotensin II receptor type 1	0.766	2.172	0.0	2.836	0.0
IFNLR1	interferon lambda receptor 1	1.021	2.606	0.0	2.552	0.0
SVIL2P	supervillin family member 2, pseudogene	1.787	2.606	0.0	1.459	0.0
KDM4D	lysine demethylase 4D	1.787	3.475	0.0	1.945	0.0
PLCD1	phospholipase C delta 1	2.042	3.04	0.0	1.489	0.0
RRN3P1	RRN3 homolog, RNA polymerase I transcription factor pseudogene 1	1.276	2.172	0.0	1.702	0.0
