# Supplementary material for: Sources of variability in nanoparticle uptake by cells
Source: Royal Society of Chemistry journal article supplement (doi:10.1039/d1nr04690j), 2021-01-01
Supplement: d1nr04690j4.csv [file d1nr04690j4.csv]

Name	Description	Unsorted (rpm)	Low (rpm)	High (rpm)	Low fold change	High fold change
LRRIQ3	leucine rich repeats and IQ motif containing 3	0.0	2.172	0.0	inf
NEK11	NIMA related kinase 11	0.0	2.172	0.0	inf
RBBP4P2	RB binding protein 4 pseudogene 2	0.255	2.172	0.0	8.508	0.0
RGS11	regulator of G protein signaling 11	0.255	2.172	0.0	8.508	0.0
LRP2BP	LRP2 binding protein	0.255	2.172	0.0	8.508	0.0
AP003469.4	novel transcript	0.255	2.172	0.0	8.508	0.0
UNC5D	unc-5 netrin receptor D	3.063	18.677	3.023	6.097	0.987
RPS4XP13	ribosomal protein S4X pseudogene 13	0.511	3.04	0.0	5.956	0.0
HSP90B2P	heat shock protein 90 beta family member 2, pseudogene	1.787	10.424	1.512	5.834	0.846
PRSS36	serine protease 36	0.766	3.909	0.756	5.105	0.987
ADAP2	ArfGAP with dual PH domains 2	2.553	12.162	0.756	4.765	0.296
RNF125	ring finger protein 125	0.766	3.475	0.0	4.538	0.0
STK32A	serine/threonine kinase 32A	0.766	3.475	0.756	4.538	0.987
RN7SL689P	RNA, 7SL, cytoplasmic 689, pseudogene	0.766	3.475	0.0	4.538	0.0
INHBE	inhibin subunit beta E	0.766	3.475	0.756	4.538	0.987
PRPH	peripherin	0.511	2.172	0.0	4.254	0.0
C3orf33	chromosome 3 open reading frame 33	1.021	4.343	0.756	4.254	0.74
HYKK	hydroxylysine kinase	1.021	4.343	0.756	4.254	0.74
GLI1	GLI family zinc finger 1	1.021	4.343	0.756	4.254	0.74
KHSRPP1	KH-type splicing regulatory protein pseudogene 1	0.511	2.172	0.0	4.254	0.0
KLHDC7B	kelch domain containing 7B	2.808	11.727	1.512	4.177	0.538
OTOG	otogelin	0.766	3.04	0.756	3.97	0.987
ZNF441	zinc finger protein 441	0.766	3.04	0.0	3.97	0.0
AC005520.2	uncharacterized LOC100506476	1.021	3.909	0.0	3.829	0.0
PIP5KL1	phosphatidylinositol-4-phosphate 5-kinase like 1	1.276	4.778	0.756	3.744	0.592
AL359397.2	novel transcript	2.297	8.253	1.512	3.592	0.658
CCDC149	coiled-coil domain containing 149	0.766	2.606	0.0	3.403	0.0
PRR36	proline rich 36	0.766	2.606	0.0	3.403	0.0
LINC00960	long intergenic non-protein coding RNA 960	1.532	5.212	1.512	3.403	0.987
ACTBP8	actin, beta pseudogene 8	0.766	2.606	0.756	3.403	0.987
SENP8	SUMO peptidase family member, NEDD8 specific	1.276	4.343	0.756	3.403	0.592
AC105250.1	heat shock 70kDa protein 5 (glucose-regulated protein, 78kDa) (HSPA5) pseudogene	0.766	2.606	0.0	3.403	0.0
SRRM4	serine/arginine repetitive matrix 4	0.766	2.606	0.0	3.403	0.0
RHPN1-AS1	RHPN1 antisense RNA 1 (head to head)	0.766	2.606	0.0	3.403	0.0
AC000068.1	novel transcript, antisense to C22orf39	0.766	2.606	0.756	3.403	0.987
AC022210.1	ribosomal protein S2 (RPS2) pseudogene	0.766	2.606	0.756	3.403	0.987
ATP7B	ATPase copper transporting beta	1.276	4.343	0.756	3.403	0.592
SNAI3-AS1	SNAI3 antisense RNA 1	0.766	2.606	0.756	3.403	0.987
BZW1P2	basic leucine zipper and W2 domains 1 pseudogene 2	1.021	3.475	0.756	3.403	0.74
ELF3-AS1	ELF3 antisense RNA 1	2.553	8.253	2.268	3.233	0.888
ICA1	islet cell autoantigen 1	2.553	8.253	2.268	3.233	0.888
EML1	echinoderm microtubule associated protein like 1	2.553	8.253	0.756	3.233	0.296
NIPAL2	NIPA like domain containing 2	2.297	7.384	1.512	3.214	0.658
ABCB6	ATP binding cassette subfamily B member 6 (Langereis blood group)	3.829	12.162	3.023	3.176	0.79
ICA1L	islet cell autoantigen 1 like	1.532	4.778	0.0	3.12	0.0
P2RX4	purinergic receptor P2X 4	1.532	4.778	1.512	3.12	0.987
ZNF561-AS1	ZNF561 antisense RNA 1 (head to head)	1.532	4.778	1.512	3.12	0.987
SLC30A4	solute carrier family 30 member 4	3.318	9.99	1.512	3.011	0.456
GDPGP1	GDP-D-glucose phosphorylase 1	1.021	3.04	0.756	2.978	0.74
KCNG3	potassium voltage-gated channel modifier subfamily G member 3	1.021	3.04	0.0	2.978	0.0
CLIC3	chloride intracellular channel 3	2.042	6.081	0.756	2.978	0.37
CA5A	carbonic anhydrase 5A	14.039	41.263	9.826	2.939	0.7
TNS1	tensin 1	9.955	29.101	10.582	2.923	1.063
SRP14-AS1	SRP14 antisense RNA1 (head to head)	1.787	5.212	0.756	2.917	0.423
SH3BP1	SH3 domain binding protein 1	0.766	2.172	0.0	2.836	0.0
AGTR1	angiotensin II receptor type 1	0.766	2.172	0.0	2.836	0.0
NMNAT3	nicotinamide nucleotide adenylyltransferase 3	1.532	4.343	1.512	2.836	0.987
ATP8B3	ATPase phospholipid transporting 8B3	2.297	6.081	2.268	2.647	0.987
HSPA5	heat shock protein family A (Hsp70) member 5	2725.346	7091.151	1479.174	2.602	0.543
EML2-AS1	EML2 antisense RNA 1	4.85	12.596	5.291	2.597	1.091
ERBB3	erb-b2 receptor tyrosine kinase 3	1.021	2.606	0.756	2.552	0.74
MRO	maestro	1.021	2.606	0.0	2.552	0.0
IFNLR1	interferon lambda receptor 1	1.021	2.606	0.0	2.552	0.0
GLIS1	GLIS family zinc finger 1	1.532	3.909	0.0	2.552	0.0
ZNF823	zinc finger protein 823	1.021	2.606	0.756	2.552	0.74
MANF	mesencephalic astrocyte derived neurotrophic factor	173.317	438.691	125.469	2.531	0.724
CDKL1	cyclin dependent kinase like 1	12.252	30.404	12.093	2.482	0.987
ZNF396	zinc finger protein 396	2.808	6.95	2.268	2.475	0.808
PARD6B	par-6 family cell polarity regulator beta	2.297	5.647	0.756	2.458	0.329
EEF1A2	eukaryotic translation elongation factor 1 alpha 2	89.849	218.042	43.083	2.427	0.479
MLXIPL	MLX interacting protein like	6.637	16.071	6.047	2.422	0.911
GARS-DT	GARS divergent transcript	4.339	10.424	2.268	2.402	0.523
PLEKHN1	pleckstrin homology domain containing N1	1.276	3.04	0.756	2.382	0.592
HSP90AB2P	heat shock protein 90 alpha family class B member 2, pseudogene	1.276	3.04	0.0	2.382	0.0
CDK5RAP3	CDK5 regulatory subunit associated protein 3	1.276	3.04	0.0	2.382	0.0
AC139887.2	uncharacterized LOC100129917	1.276	3.04	0.0	2.382	0.0
FAM13C	family with sequence similarity 13 member C	7.402	17.374	3.023	2.347	0.408
PROB1	proline rich basic protein 1	2.297	5.212	2.268	2.269	0.987
AC008105.3	novel transcript, antisense to FMNL1	3.063	6.95	3.023	2.269	0.987
USP27X	ubiquitin specific peptidase 27 X-linked	2.297	5.212	2.268	2.269	0.987
THNSL1	threonine synthase like 1	4.595	10.424	3.023	2.269	0.658
CRELD2	cysteine rich with EGF like domains 2	196.035	440.862	83.142	2.249	0.424
KCNT2	potassium sodium-activated channel subfamily T member 2	5.105	11.293	4.535	2.212	0.888
DUSP8	dual specificity phosphatase 8	10.21	22.586	3.023	2.212	0.296
FAM227A	family with sequence similarity 227 member A	1.787	3.909	1.512	2.188	0.846
ZNF888	zinc finger protein 888	1.787	3.909	1.512	2.188	0.846
SPINK6	serine peptidase inhibitor, Kazal type 6	162.086	354.427	175.354	2.187	1.082
KTN1-AS1	KTN1 antisense RNA 1	2.808	6.081	3.023	2.166	1.077
SDF2L1	stromal cell derived factor 2 like 1	60.495	130.738	34.013	2.161	0.562
HERPUD1	homocysteine inducible ER protein with ubiquitin like domain 1	175.359	378.316	127.737	2.157	0.728
SAMD11	sterile alpha motif domain containing 11	58.453	125.092	48.374	2.14	0.828
HYOU1	hypoxia up-regulated 1	678.465	1448.982	284.951	2.136	0.42
WISP2	WNT1 inducible signaling pathway protein 2	50.285	107.284	31.745	2.134	0.631
PCDHGC3	protocadherin gamma subfamily C, 3	3.063	6.515	3.023	2.127	0.987
AC007238.1	IK cytokine, down-regulator of HLA II (IK) pseudogene	1.021	2.172	0.0	2.127	0.0
C16orf71	chromosome 16 open reading frame 71	1.021	2.172	0.0	2.127	0.0
CNTF	ciliary neurotrophic factor	1.021	2.172	0.0	2.127	0.0
LRRC8E	leucine rich repeat containing 8 VRAC subunit E	3.063	6.515	1.512	2.127	0.494
F8A1	coagulation factor VIII associated 1	2.042	4.343	0.0	2.127	0.0
APOM	apolipoprotein M	1.021	2.172	0.0	2.127	0.0
PIGZ	phosphatidylinositol glycan anchor biosynthesis class Z	1.021	2.172	0.0	2.127	0.0
THAP3	THAP domain containing 3	6.381	13.465	5.291	2.11	0.829
PLPP5	phospholipid phosphatase 5	12.763	26.93	9.826	2.11	0.77
IFT57	intraflagellar transport 57	11.742	24.758	12.849	2.109	1.094
DDIT3	DNA damage inducible transcript 3	15.06	31.707	8.314	2.105	0.552
AC026471.1	novel transcript, antisense to ARMC5	4.595	9.556	4.535	2.08	0.987
CRELD1	cysteine rich with EGF like domains 1	54.114	112.496	26.454	2.079	0.489
PDIA4	protein disulfide isomerase family A member 4	535.268	1111.494	256.229	2.077	0.479
MIR100HG	mir-100-let-7a-2-mir-125b-1 cluster host gene	17.868	36.92	17.384	2.066	0.973
SLC4A11	solute carrier family 4 member 11	3.574	7.384	3.023	2.066	0.846
C15orf65	chromosome 15 open reading frame 65	4.85	9.99	3.779	2.06	0.779
KDM4A-AS1	KDM4A antisense RNA 1	1.276	2.606	0.0	2.042	0.0
C4orf33	chromosome 4 open reading frame 33	3.829	7.818	3.779	2.042	0.987
ZNF767P	zinc finger family member 767, pseudogene	1.276	2.606	0.756	2.042	0.592
ZNF702P	zinc finger protein 702, pseudogene	1.276	2.606	0.756	2.042	0.592
ELAC1	elaC ribonuclease Z 1	1.276	2.606	0.756	2.042	0.592
PIWIL4	piwi like RNA-mediated gene silencing 4	1.276	2.606	0.0	2.042	0.0
AC011497.2	zinc finger, AN1-type domain 5 (ZFAND5) pseudogene	1.276	2.606	0.756	2.042	0.592
MAPRE3	microtubule associated protein RP/EB family member 3	5.105	10.424	5.291	2.042	1.036
TBC1D10A	TBC1 domain family member 10A	1.276	2.606	0.756	2.042	0.592
TIGAR	TP53 induced glycolysis regulatory phosphatase	1.276	2.606	0.0	2.042	0.0
NUDT18	nudix hydrolase 18	1.276	2.606	0.756	2.042	0.592
GMDS-DT	GMDS divergent transcript	1.276	2.606	0.0	2.042	0.0
HLA-G	major histocompatibility complex, class I, G	16.081	32.576	15.117	2.026	0.94
HARBI1	harbinger transposase derived 1	2.808	5.647	2.268	2.011	0.808
BOK	BOK, BCL2 family apoptosis regulator	16.592	8.253	34.769	0.497	2.096
AADAT	aminoadipate aminotransferase	6.126	3.04	9.07	0.496	1.481
DPP3	dipeptidyl peptidase 3	24.504	12.162	26.454	0.496	1.08
HIVEP3	human immunodeficiency virus type I enhancer binding protein 3	31.141	15.202	38.548	0.488	1.238
TWSG1	twisted gastrulation BMP signaling modulator 1	49.264	23.889	51.397	0.485	1.043
ETV5	ETS variant 5	23.483	11.293	43.083	0.481	1.835
NUAK2	NUAK family kinase 2	8.168	3.909	11.338	0.479	1.388
RBM4B	RNA binding motif protein 4B	19.144	9.121	20.408	0.476	1.066
ADGRL2	adhesion G protein-coupled receptor L2	45.18	21.283	57.444	0.471	1.271
ABCB1	ATP binding cassette subfamily B member 1	2.808	1.303	6.047	0.464	2.154
PDGFD	platelet derived growth factor D	5.616	2.606	9.826	0.464	1.75
DLL3	delta like canonical Notch ligand 3	2.808	1.303	6.047	0.464	2.154
ZNF586	zinc finger protein 586	8.423	3.909	12.093	0.464	1.436
PRDM1	PR/SET domain 1	2.808	1.303	7.558	0.464	2.692
PCDH7	protocadherin 7	84.489	39.091	105.817	0.463	1.252
BNC2	basonuclin 2	27.312	12.596	28.722	0.461	1.052
GLRB	glycine receptor beta	7.658	3.475	12.849	0.454	1.678
DUSP6	dual specificity phosphatase 6	25.015	11.293	25.698	0.451	1.027
TMTC2	transmembrane and tetratricopeptide repeat containing 2	21.186	9.556	22.675	0.451	1.07
AC093297.2	novel transcript	8.679	3.909	12.849	0.45	1.481
ARHGAP26	Rho GTPase activating protein 26	14.549	6.515	22.675	0.448	1.558
ICAM1	intercellular adhesion molecule 1	20.42	9.121	19.652	0.447	0.962
F3	coagulation factor III, tissue factor	9.955	4.343	22.675	0.436	2.278
IGFBP5	insulin like growth factor binding protein 5	73.258	31.707	193.494	0.433	2.641
TBX3	T-box 3	16.081	6.95	18.14	0.432	1.128
ABCA1	ATP binding cassette subfamily A member 1	3.063	1.303	21.163	0.425	6.909
LPAR3	lysophosphatidic acid receptor 3	4.084	1.737	6.803	0.425	1.666
KRT17P3	keratin 17 pseudogene 3	1.021	0.434	6.047	0.425	5.922
AC016717.2	novel transcript	4.084	1.737	11.338	0.425	2.776
UBASH3B	ubiquitin associated and SH3 domain containing B	2.042	0.869	7.558	0.425	3.701
FMC1	formation of mitochondrial complex V assembly factor 1 homolog	2.042	0.869	5.291	0.425	2.591
CCDC7	coiled-coil domain containing 7	1.021	0.434	4.535	0.425	4.442
LIF	LIF, interleukin 6 family cytokine	8.168	3.475	18.896	0.425	2.313
PTGES	prostaglandin E synthase	5.105	2.172	37.036	0.425	7.255
PTPRE	protein tyrosine phosphatase, receptor type E	4.084	1.737	6.803	0.425	1.666
LYPD6B	LY6/PLAUR domain containing 6B	3.063	1.303	6.803	0.425	2.221
MOB3C	MOB kinase activator 3C	7.402	3.04	9.07	0.411	1.225
RSPO3	R-spondin 3	19.144	7.818	32.501	0.408	1.698
SETBP1	SET binding protein 1	12.763	5.212	27.966	0.408	2.191
AKAP12	A-kinase anchoring protein 12	340.254	138.122	413.443	0.406	1.215
AFF3	AF4/FMR2 family member 3	17.102	6.95	24.187	0.406	1.414
IGFN1	immunoglobulin-like and fibronectin type III domain containing 1	10.721	4.343	11.338	0.405	1.058
VEGFC	vascular endothelial growth factor C	5.36	2.172	7.558	0.405	1.41
TAGLN	transgelin	92.402	36.92	226.751	0.4	2.454
ICAM3	intercellular adhesion molecule 3	4.339	1.737	16.628	0.4	3.832
DUSP4	dual specificity phosphatase 4	21.952	8.687	79.363	0.396	3.615
CSF2RA	colony stimulating factor 2 receptor alpha subunit	3.318	1.303	7.558	0.393	2.278
SLC16A9	solute carrier family 16 member 9	3.318	1.303	6.803	0.393	2.05
EPHA7	EPH receptor A7	12.252	4.778	18.896	0.39	1.542
TGM2	transglutaminase 2	151.876	59.071	489.027	0.389	3.22
TENM2	teneurin transmembrane protein 2	14.549	5.647	46.106	0.388	3.169
MIR600HG	MIR600 host gene	5.616	2.172	7.558	0.387	1.346
SUSD2	sushi domain containing 2	4.595	1.737	27.21	0.378	5.922
HTR1D	5-hydroxytryptamine receptor 1D	8.168	3.04	18.14	0.372	2.221
ETV4	ETS variant 4	61.006	22.586	73.316	0.37	1.202
DAPK1	death associated protein kinase 1	7.147	2.606	14.361	0.365	2.009
IL1R1	interleukin 1 receptor type 1	21.441	7.818	26.454	0.365	1.234
PROM1	prominin 1	3.574	1.303	7.558	0.365	2.115
SLC2A3	solute carrier family 2 member 3	66.111	23.889	107.329	0.361	1.623
POLD4	DNA polymerase delta 4, accessory subunit	4.85	1.737	6.803	0.358	1.403
RUNX2	runt related transcription factor 2	4.85	1.737	9.07	0.358	1.87
LHX4	LIM homeobox 4	11.231	3.909	12.093	0.348	1.077
DUSP5	dual specificity phosphatase 5	22.718	7.818	43.839	0.344	1.93
C1S	complement C1s	14.039	4.778	19.652	0.34	1.4
RAB3B	RAB3B, member RAS oncogene family	5.105	1.737	22.675	0.34	4.442
AFAP1L2	actin filament associated protein 1 like 2	2.553	0.869	6.803	0.34	2.665
ABTB2	ankyrin repeat and BTB domain containing 2	23.228	7.818	27.966	0.337	1.204
DBP	D-box binding PAR bZIP transcription factor	16.081	5.212	15.117	0.324	0.94
MYLK	myosin light chain kinase	9.444	3.04	20.408	0.322	2.161
C3	complement C3	67.642	21.717	99.771	0.321	1.475
NYAP2	neuronal tyrosine-phosphorylated phosphoinositide-3-kinase adaptor 2	4.084	1.303	6.803	0.319	1.666
ABLIM3	actin binding LIM protein family member 3	4.084	1.303	18.896	0.319	4.627
HSPA2	heat shock protein family A (Hsp70) member 2	6.892	2.172	10.582	0.315	1.535
C1R	complement C1r	24.249	7.384	26.454	0.305	1.091
HRK	harakiri, BCL2 interacting protein	4.339	1.303	7.558	0.3	1.742
NT5E	5'-nucleotidase ecto	29.099	8.687	33.257	0.299	1.143
LHX9	LIM homeobox 9	8.934	2.606	12.093	0.292	1.354
FRMD4A	FERM domain containing 4A	3.063	0.869	10.582	0.284	3.455
PRICKLE1	prickle planar cell polarity protein 1	4.595	1.303	9.826	0.284	2.139
KCNJ6	potassium voltage-gated channel subfamily J member 6	1.532	0.434	6.047	0.284	3.948
RPSAP58	ribosomal protein SA pseudogene 58	1.532	0.434	7.558	0.284	4.935
AXIN2	axin 2	7.658	2.172	11.338	0.284	1.481
RAPGEF3	Rap guanine nucleotide exchange factor 3	4.595	1.303	6.803	0.284	1.481
TNFRSF21	TNF receptor superfamily member 21	32.673	9.121	36.28	0.279	1.11
FST	follistatin	14.039	3.909	25.698	0.278	1.831
ZNF599	zinc finger protein 599	4.85	1.303	6.047	0.269	1.247
PLXNA4	plexin A4	3.318	0.869	8.314	0.262	2.506
COL16A1	collagen type XVI alpha 1 chain	8.423	2.172	15.117	0.258	1.795
VIT	vitrin	5.105	1.303	7.558	0.255	1.481
CACNA1C	calcium voltage-gated channel subunit alpha1 C	6.892	1.737	9.826	0.252	1.426
EIF4BP7	eukaryotic translation initiation factor 4B pseudogene 7	1.787	0.434	4.535	0.243	2.538
IL7R	interleukin 7 receptor	1.787	0.434	11.338	0.243	6.345
NRG1	neuregulin 1	1.787	0.434	9.07	0.243	5.076
SCN1B	sodium voltage-gated channel beta subunit 1	1.787	0.434	5.291	0.243	2.961
FAP	fibroblast activation protein alpha	1.787	0.434	5.291	0.243	2.961
SPRY1	sprouty RTK signaling antagonist 1	1.787	0.434	5.291	0.243	2.961
BCAM	basal cell adhesion molecule (Lutheran blood group)	34.97	7.818	84.654	0.224	2.421
WNT5B	Wnt family member 5B	2.042	0.434	6.803	0.213	3.331
PAQR5	progestin and adipoQ receptor family member 5	2.042	0.434	10.582	0.213	5.182
ACTA2	actin, alpha 2, smooth muscle, aorta	102.357	21.717	223.728	0.212	2.186
KCND3	potassium voltage-gated channel subfamily D member 3	4.339	0.869	7.558	0.2	1.742
MKRN3	makorin ring finger protein 3	4.339	0.869	5.291	0.2	1.219
KATNAL2	katanin catalytic subunit A1 like 2	2.297	0.434	4.535	0.189	1.974
SPRY4	sprouty RTK signaling antagonist 4	2.297	0.434	6.803	0.189	2.961
TP53I11	tumor protein p53 inducible protein 11	2.297	0.434	9.07	0.189	3.948
ACTG2	actin, gamma 2, smooth muscle, enteric	4.595	0.869	12.093	0.189	2.632
PLPP3	phospholipid phosphatase 3	11.742	2.172	12.849	0.185	1.094
ABLIM2	actin binding LIM protein family member 2	9.444	1.737	10.582	0.184	1.12
GPNMB	glycoprotein nmb	4.85	0.869	30.233	0.179	6.234
PDZD2	PDZ domain containing 2	10.21	1.737	23.431	0.17	2.295
RNF144A	ring finger protein 144A	2.808	0.434	6.047	0.155	2.154
RORA	RAR related orphan receptor A	3.063	0.434	5.291	0.142	1.727
FCGRT	Fc fragment of IgG receptor and transporter	3.318	0.434	7.558	0.131	2.278
BACH2	BTB domain and CNC homolog 2	6.892	0.869	10.582	0.126	1.535
SYT13	synaptotagmin 13	8.423	0.869	9.07	0.103	1.077
PTPRG	protein tyrosine phosphatase, receptor type G	10.465	0.869	10.582	0.083	1.011
TRIB2	tribbles pseudokinase 2	8.168	0.434	7.558	0.053	0.925
SH3RF3	SH3 domain containing ring finger 3	0.255	0.0	4.535	0.0	17.767
CNN1	calponin 1	0.511	0.0	6.047	0.0	11.844
TRPC4	transient receptor potential cation channel subfamily C member 4	1.021	0.0	7.558	0.0	7.403
LGR6	leucine rich repeat containing G protein-coupled receptor 6	3.063	0.0	6.803	0.0	2.221
POPDC3	popeye domain containing 3	0.511	0.0	7.558	0.0	14.806
RASSF5	Ras association domain family member 5	1.787	0.0	5.291	0.0	2.961
BMP4	bone morphogenetic protein 4	0.511	0.0	6.803	0.0	13.325
TCN2	transcobalamin 2	0.511	0.0	4.535	0.0	8.883
SEMA5A	semaphorin 5A	0.255	0.0	3.779	0.0	14.806
AC006262.2	novel transcript	0.255	0.0	7.558	0.0	29.611
INSYN2B	inhibitory synaptic factor family member 2B	0.766	0.0	3.779	0.0	4.935
GPC4	glypican 4	1.532	0.0	11.338	0.0	7.403
HOXA3	homeobox A3	0.766	0.0	6.803	0.0	8.883
FZD9	frizzled class receptor 9	1.532	0.0	3.779	0.0	2.468
WDR86	WD repeat domain 86	2.808	0.0	4.535	0.0	1.615
HHAT	hedgehog acyltransferase	0.255	0.0	6.803	0.0	26.65
TFAP2C	transcription factor AP-2 gamma	0.766	0.0	4.535	0.0	5.922
COL6A2	collagen type VI alpha 2 chain	1.021	0.0	5.291	0.0	5.182
CYB5R2	cytochrome b5 reductase 2	0.766	0.0	3.779	0.0	4.935
C2orf74	chromosome 2 open reading frame 74	1.276	0.0	3.779	0.0	2.961
CENPS	centromere protein S	1.021	0.0	4.535	0.0	4.442
LINC01537	long intergenic non-protein coding RNA 1537	1.532	0.0	3.779	0.0	2.468
SNCAIP	synuclein alpha interacting protein	4.084	0.0	3.779	0.0	0.925
AC009229.1	novel transcript	0.766	0.0	3.779	0.0	4.935
CARD11	caspase recruitment domain family member 11	0.255	0.0	4.535	0.0	17.767
FBXO27	F-box protein 27	2.042	0.0	3.779	0.0	1.851
CREB3L1	cAMP responsive element binding protein 3 like 1	1.276	0.0	13.605	0.0	10.66
AC010894.2	novel transcript	0.766	0.0	3.779	0.0	4.935
SCN5A	sodium voltage-gated channel alpha subunit 5	1.021	0.0	4.535	0.0	4.442
BOC	BOC cell adhesion associated, oncogene regulated	3.318	0.0	6.803	0.0	2.05
IL17RD	interleukin 17 receptor D	1.276	0.0	3.779	0.0	2.961
AC139749.1	uncharacterized LOC101927503	0.766	0.0	3.779	0.0	4.935
HMCN1	hemicentin 1	1.787	0.0	7.558	0.0	4.23
TP63	tumor protein p63	1.021	0.0	4.535	0.0	4.442
